# Supplementary material for: Resident Education and Wellness: A Strategy for Future Pandemics
Source: Research Square preprint supplement (doi:10.21203/rs.3.rs-146034/v1), 2021-01-22
Supplement: Supplementary file 1 [file 1bed64ea04264dd76d32f8f9.docx]

**Resident Education and Wellness: A Strategy for Future Pandemics**

Supplementary File 1: Resident Survey

Samuel L. Posey, MD1; Josef E. Jolissaint, MD1; Aaron M. Brandt, MD1; Rachel B. Seymour, PhD1; Stephen H. Sims, MD1; Joseph R. Hsu, MD1; Joshua C. Patt, MD1; Brian Scannell, MD1

1Department of Orthopaedic Surgery, Atrium Health Musculoskeletal Institute; 1000 Blythe Boulevard, Charlotte, NC 28203

Corresponding Author: Brian P. Scannell, MD

1000 Blythe Boulevard

Charlotte, NC 28204

Phone: 704-446-2060

Email: Brian.Scannell@atriumhealth.org

All questions on a 5-point scale of “strongly agree” to “strongly disagree”.

1. I felt supported by the organization and program leadership.
2. I had the tools I needed to protect myself from COVID-19 while providing patient care.
3. Program leadership cares about my safety and well-being.
4. I am concerned that COVID-19 will have a negative impact on my training and preparedness for my career.
   1. Or: Lack of in-person skills training will have a negative impact on my preparedness.
5. I missed important opportunities for subspecialty exposure.
6. My program provided valuable educational opportunities during COVID-19.
7. Virtual educational opportunities are as valuable as in person.
8. I enjoyed the wellness competition and felt that it helped keep our residency together despite social distancing restrictions.
9. I felt that mentors and faculty were more accessible due to the virtual platforms established during the COVID-19 pandemic.
